# Supplementary material for: Hydrothermal Synthesis of Functionalized Carbon Nanodots and Their Clusters as Ionic Probe for High Sensitivity and Selectivity for Sulfate Anions with Excellent Detection Level
Source: MDPI journal article supplement (doi:10.3390/polym15122655), 2023-06-12
Supplement: s1 [file s1]

Supplementary Material

# Hydrothermal Synthesis of Functionalized Carbon Nanodots and Their Clusters as Ionic Probe for High Sensitivity and Selectivity for Sulfate Anions with Excellent Detection Level

Po-Chih Yang <sup>1,\*</sup>, Pradeep Kumar Panda <sup>1</sup>, Cheng-Han Li <sup>1</sup>, Yu-Xuan Ting <sup>1</sup>, Yasser Ashraf Gandomi <sup>2</sup> and Chien-Te Hsieh <sup>1,\*</sup>

<sup>1</sup> Department of Chemical Engineering and Materials Science, Yuan Ze University, Taoyuan 32003, Taiwan; rkpanda277@gmail.com (P.K.P.); s1071127@mail.yzu.edu.tw (C.-H.L.); danny0935331003@gmail.com (Y.-X.T.)

<sup>2</sup> Department of Chemical Engineering, Massachusetts Institute of Technology, Cambridge, MA 02142, USA; ygandomi@mit.edu

\* Correspondence: pcyang@saturn.yzu.edu.tw (P.-C.Y.); cthsieh@saturn.yzu.edu.tw (C.-T.H.)

**Table S1.** The  $K_{sv}$  and LOD parameters, together with the  $r^2$  values, of both CND samples towards three metal ions.

| Sample                 | CND                           |       |           | CND-100k                      |       |           |
|------------------------|-------------------------------|-------|-----------|-------------------------------|-------|-----------|
|                        | $K_{sv}$ (ppm <sup>-1</sup> ) | $r^2$ | LOD (ppm) | $K_{sv}$ (ppm <sup>-1</sup> ) | $r^2$ | LOD (ppm) |
| <b>Fe<sup>3+</sup></b> | 0.2358                        | 0.992 | 0.05      | 0.0443                        | 0.997 | 0.28      |
| <b>Fe<sup>2+</sup></b> | 0.0226                        | 0.999 | 0.56      | 0.0191                        | 0.999 | 0.66      |
| <b>Hg<sup>2+</sup></b> | 0.0051                        | 0.996 | 2.47      | 0.0078                        | 0.999 | 1.62      |

Remark:

$$\sigma = \sqrt{\frac{1}{N} \sum_{i=1}^N (x_i - \bar{x})^2}$$

**Table S2.** Comparison among the LODs toward metal ions by different CND samples.

| Method                 | detector/metal ion        | LOD (ppm) | Reference |
|------------------------|---------------------------|-----------|-----------|
| Hydrothermal synthesis | CND/Fe <sup>3+</sup>      | 0.05      | This work |
| Hydrothermal synthesis | CND/Fe <sup>2+</sup>      | 0.56      | This work |
| Hydrothermal synthesis | CND-100k/Hg <sup>2+</sup> | 1.62      | This work |
| Liquid-phase synthesis | N-CQD/Hg <sup>2+</sup>    | 2.4       | [50]      |
| Solvothermal synthesis | N-CQD/Hg <sup>2+</sup>    | 1.0       | [51]      |
| Commercial product     | Lysozyme/Fe <sup>3+</sup> | 0.1       | [52]      |
| Chemical reduction     | Ag NP/Hg <sup>2+</sup>    | 0.02      | [53]      |
| Chemical reduction     | Au NP/Fe <sup>2+</sup>    | 0.02      | [28]      |

Remark: N-CQD: N-doped carbon quantum dot; Ag NPs: silver nanoplate; Au NPs: gold nanoparticle

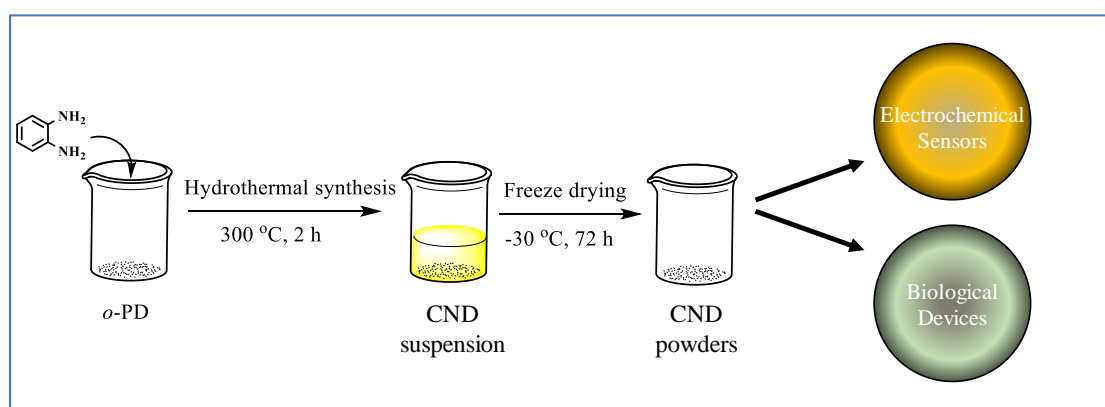**Figure S1.** Schematic diagram for illustrating the preparation of CND powders and their application.

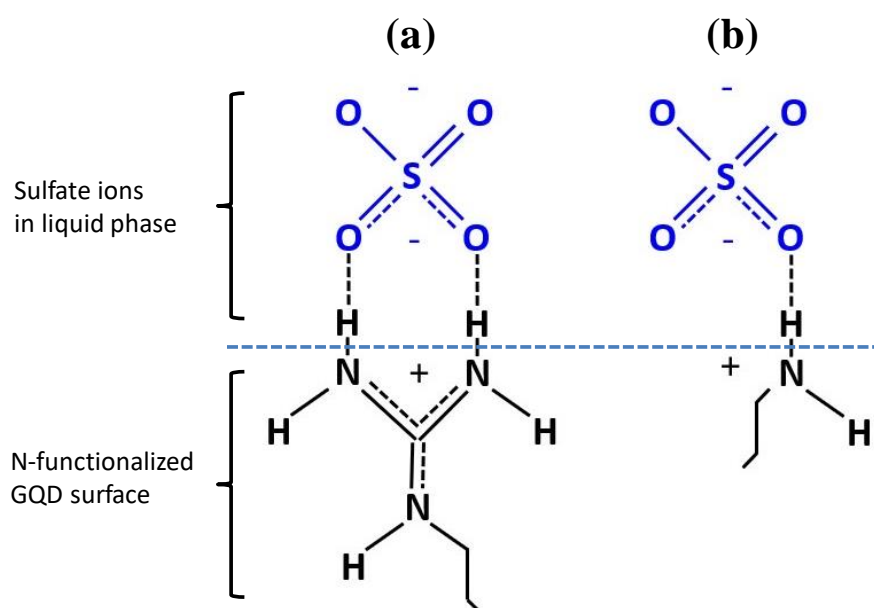

**Figure S2.** The interaction process through two pathways: (a) two neighboring amino groups via a bidentate hydrogen-bonding and (b) one single amino group via a monodentate hydrogen-bonding with hydrogen sulfate anions on N-functionalized CND surface.

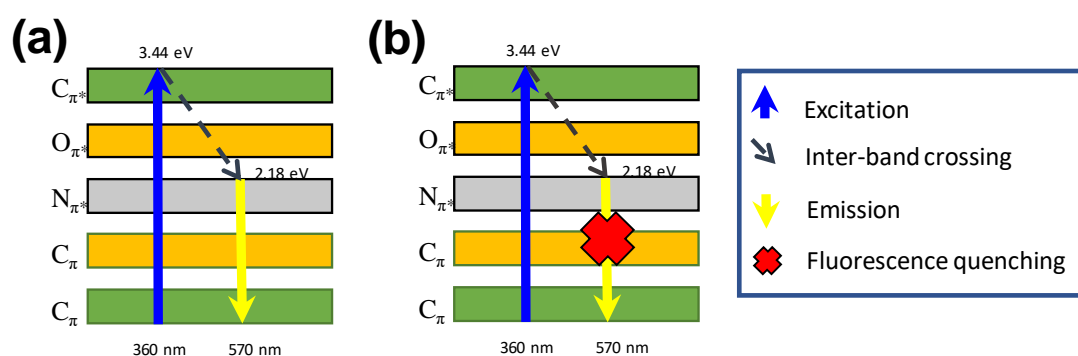

**Figure S3.** Inter-band gap structure models of CND sample under UV illumination: (a) before and (b) after detecting metal ions.
